# Supplementary material
Source: PubMed Central journal article supplement (PMC9062767)
Supplement: jamainternmed-e221449-s002.pdf [file jamainternmed-e221449-s002.pdf]

## Supplemental Online Content

Shlipak MG, Sheshadri A, Hsu FC, et al; LIFE Investigators. Effect of structured, moderate exercise on kidney function decline in sedentary older adults: an ancillary analysis of the LIFE Study randomized clinical trial. *JAMA Intern Med*. Published online May 2, 2022. doi:10.1001/jamainternmed.2022.1449

**eTable 1.** Comparison of participants with and without cystatin C measures

**eTable 2.** Effect of randomization to the physical activity and exercise intervention group versus the health education control group of the LIFE trial on longitudinal changes in eGFR<sub>CysC</sub> over 2 years, stratified by key subgroups

**eFigure**

**eMethods**

**eAppendix.** Research Investigators for the LIFE Study

This supplemental material has been provided by the authors to give readers additional information about their work.

**eTable 1. Comparison of participants with and without cystatin C measures**

|                                                                        | <b><i>Without<br/>eGFR<sub>CysC</sub><br/>(n=436)</i></b> | <b><i>With<br/>eGFR<sub>CysC</sub><br/>(n=1199)</i></b> | <b><i>Overall<br/>(n=1635)</i></b> | <b><i>p-<br/>value*</i></b> |
|------------------------------------------------------------------------|-----------------------------------------------------------|---------------------------------------------------------|------------------------------------|-----------------------------|
| <b>Age, years</b>                                                      | 78.9 (5.3)                                                | 78.9 (5.2)                                              | 78.9 (5.2)                         | 0.88**                      |
| <b>Female</b>                                                          | 298 (68.3)                                                | 800 (66.7)                                              | 1098 (67.2)                        | 0.54                        |
| <b>Race</b>                                                            |                                                           |                                                         |                                    | 0.78                        |
| <b>Black</b>                                                           | 72 (16.5)                                                 | 216 (18.0)                                              | 288 (17.6)                         |                             |
| <b>White</b>                                                           | 335 (76.8)                                                | 904 (75.4)                                              | 1239 (75.8)                        |                             |
| <b>Other</b>                                                           | 29 (6.7)                                                  | 79 (6.6)                                                | 108 (6.6)                          |                             |
| <b>Diabetes status</b>                                                 |                                                           |                                                         |                                    | <.001                       |
| <b>No Diabetes</b>                                                     | 243 (55.7)                                                | 576 (48.0)                                              | 819 (50.1)                         |                             |
| <b>Impaired fasting glucose</b>                                        | 61 (14.0)                                                 | 296 (24.7)                                              | 357 (21.8)                         |                             |
| <b>Diabetes</b>                                                        | 132 (30.3)                                                | 327 (27.3)                                              | 459 (28.1)                         |                             |
| <b>CVD</b>                                                             | 137 (31.4)                                                | 354 (29.5)                                              | 491 (30.0)                         | 0.46                        |
| <b>Hypertension</b>                                                    | 302 (69.9)                                                | 855 (71.7)                                              | 1157 (71.2)                        | 0.47                        |
| <b>Minutes of moderate-intensity<br/>activity (&gt;760 counts/min)</b> | 26.1 (23.6)                                               | 28.3 (24.8)                                             | 27.7 (24.5)                        | 0.21***                     |
| <b>Total steps</b>                                                     | 2602 (1538)                                               | 2720 (1484)                                             | 2688<br>(1499)                     | 0.10***                     |

CVD = cardiovascular disease.

\*For discrete variables, chi-squared tests are used.

\*\* t-test

\*\*\* Wilcoxon rank sum test

**eTable 2. Effect of randomization to the physical activity and exercise intervention group versus the health education control group of the LIFE trial on longitudinal changes in eGFR<sub>CysC</sub> over 2 years, stratified by key subgroups**

| Within key subgroups       | Change in eGFR <sub>CysC</sub><br>(95% CI) | p-value | p-value for interaction* |
|----------------------------|--------------------------------------------|---------|--------------------------|
| Age                        |                                            |         | 0.41**                   |
| Lower                      | 0.53 (-0.87 – 1.94)                        | 0.46    |                          |
| Higher                     | 1.38 (0.11 – 2.65)                         | 0.03    |                          |
| Sex                        |                                            |         | 0.07**                   |
| Male                       | 2.44 (0.57 – 4.32)                         | 0.01    |                          |
| Female                     | 0.31 (-0.76 – 1.38)                        | 0.57    |                          |
| Race                       |                                            |         | 0.57                     |
| Black                      | -0.22 (-2.37 – 1.94)                       | 0.84    |                          |
| White                      | 1.35 (0.24 – 2.46)                         | 0.02    |                          |
| Other                      | 0.12;(-3.43 – 3.67)                        | 0.95    |                          |
| eGFR <median               |                                            |         | 0.18                     |
| Lower                      | 0.49 (-0.46 – 1.45)                        | 0.31    |                          |
| Higher                     | 1.17;(-0.09 – 2.43)                        | 0.07    |                          |
| HTN                        |                                            |         | 0.73                     |
| Yes                        | 0.87 (-0.26 – 1.99)                        | 0.13    |                          |
| no                         | 0.72 (-0.98 – 2.43)                        | 0.40    |                          |
| DM                         |                                            |         | 0.25                     |
| Yes                        | 0.43;(-1.66 – 2.52)                        | 0.68    |                          |
| Impaired glucose tolerance | 2.24 (0.36 – 4.12)                         | 0.02    |                          |
| no                         | 0.64 (-0.62 – 1.91)                        | 0.32    |                          |
| CVD                        |                                            |         | 0.14                     |
| Yes                        | 0.04 (-1.68 – 1.76)                        | 0.96    |                          |
| no                         | 1.32 (0.18 – 2.45)                         | 0.02    |                          |
| CKD                        |                                            |         | 0.04                     |
| Yes                        | 0.43 (-1.48 – 1.14)                        | 0.35    |                          |
| no                         | 1.63 (0.05 – 3.22)                         | 0.04    |                          |

\*Adjusted for gender and clinical sites

\*\*Not adjusted for clinical sites due to failure of model to converge when adjusting for clinical sites

eFigure

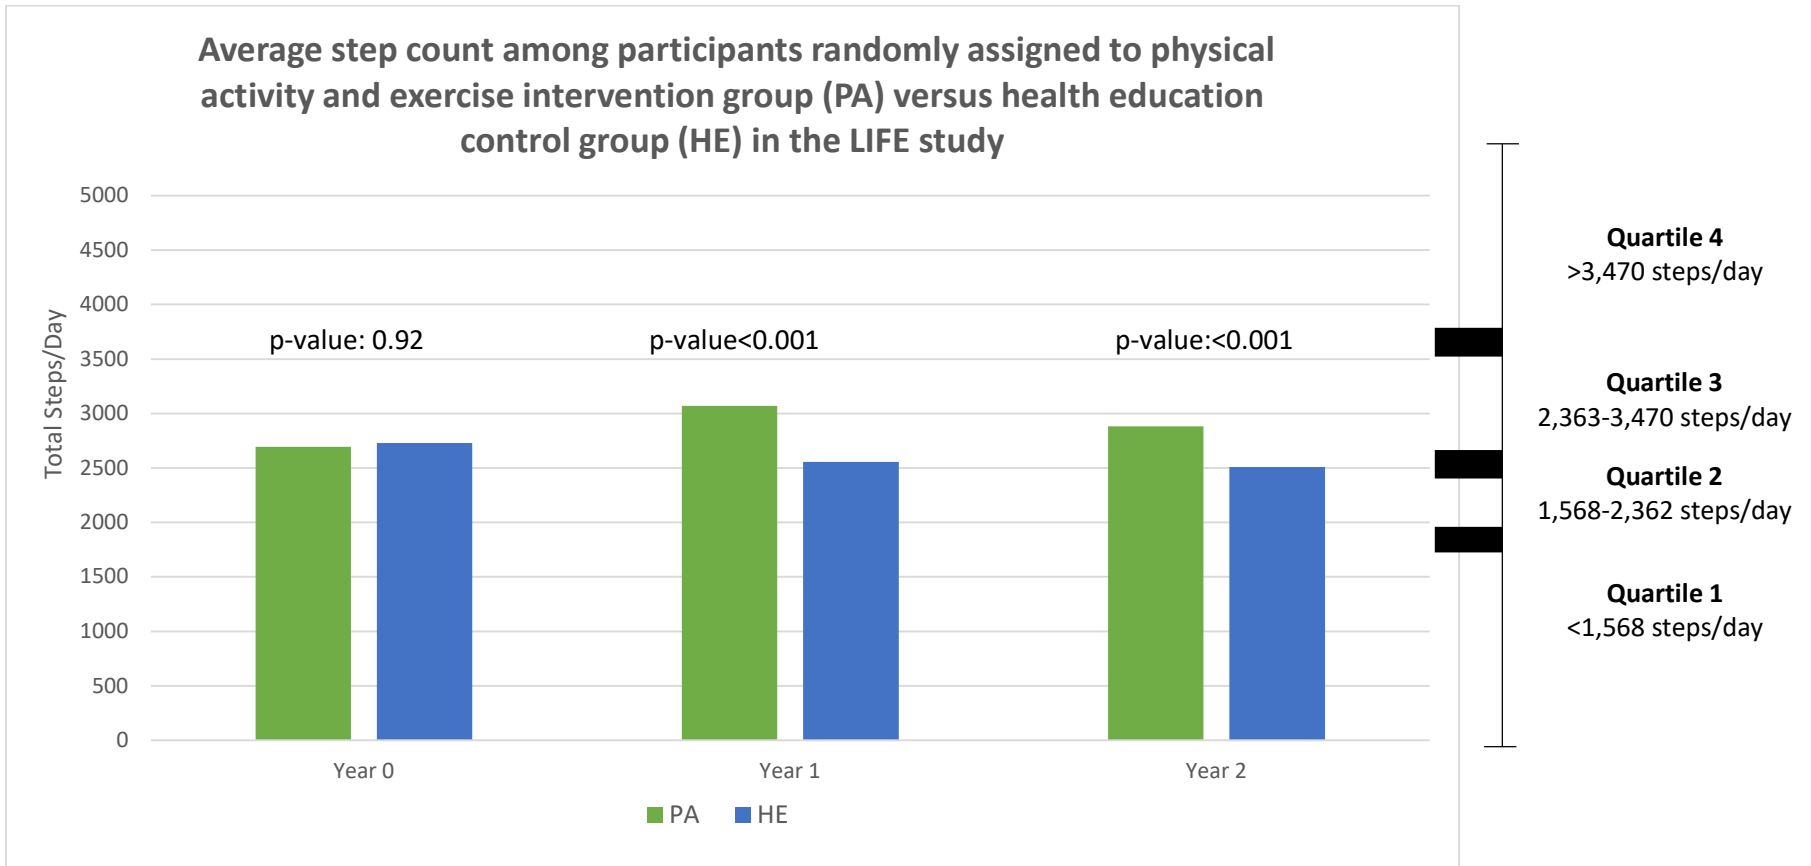

## **eMethods**

*Accelerometry:* Participants were instructed to wear an accelerometer (Actigraph GT3X) on their hip for seven consecutive days except during sleep, showering/bathing, and swimming. Movement was captured along the vertical axis in 1-minute intervals, and non-wear time was defined as 90 minutes of consecutive zero counts. Data were considered valid if the device was worn for  $\geq 600$  minutes per day for at least five days. Data reduction focused on technical and procedural errors as well as evident outliers. Total physical activity was calculated as the average number of daily activity counts per minute. In the absence of well-accepted, evidence-based accelerometry cut-points for physical activity intensity in older adults, a cut-point was set that defined active time ( $> 760$  activity counts/minute). Data were expressed in min/week, and all data were adjusted for wear time.

## **eAppendix. Research Investigators for the LIFE Study**

The Lifestyle Interventions and Independence for Elders Study was funded by a National Institutes of Health/National Institute on Aging Cooperative Agreement #U01 AG22376 and a supplement from the National Heart, Lung and Blood Institute 3U01AG022376-05A2S, and sponsored in part by the Intramural Research Program, National Institute on Aging, NIH.

The research is partially supported by the Claude D. Pepper Older Americans Independence Centers at the University of Florida (1 P30 AG028740), Wake Forest University (1 P30 AG21332), Tufts University (1P30AG031679), University of Pittsburgh (P30 AG024827), and Yale University (P30AG021342) and the NIH/NCRR CTSA at Stanford University (UL1 RR025744),

Tufts University is also supported by the Boston Rehabilitation Outcomes Center (1R24HD065688-01A1).

LIFE investigators are also partially supported by the following:

Dr. W. Jack Rejeski and Anthony P. Marsh were supported, in part, from the following mechanisms: (a) National Heart, Lung, and Blood Institute grant R18 HL076441, (b) National Institutes for Aging grant P30 AG021332, and (c) General Clinical Research Center grant, M01-RR007122.

Dr. Thomas Gill (Yale University) is the recipient of an Academic Leadership Award (K07AG3587) from the National Institute on Aging.

Dr. Roger Fielding (Tufts University) is partially supported by the U.S. Department of Agriculture, under agreement No. 58-1950-0-014. Any opinions, findings, conclusion, or recommendations expressed in this publication are those of the author(s) and do not necessarily reflect the view of the U.S. Dept of Agriculture.

### **Administrative Coordinating Center, University of Florida, Gainesville, FL**

Marco Pahor, MD – Principal Investigator of the LIFE Study

Jack M. Guralnik, MD, PhD – Co-Investigator of the LIFE Study (University of Maryland School of Medicine, Baltimore, MD)

Christian Leeuwenburgh, PhD

Connie Caudle

Lauren Crump, MPH

Latonia Holmes

Jocelyn Lee, PhD

Ching-ju Lu, MPH

### **Data Management, Analysis and Quality Control Center, Wake Forest University, Winston Salem, NC**

Michael E. Miller, PhD – DMAQC Principal Investigator

Mark A. Espeland, PhD – DMAQC Co-Investigator

Walter T. Ambrosius, PhD

William Applegate, MD

Daniel P. Beavers, PhD, MS

Robert P. Byington, PhD, MPH, FAHA

Delilah Cook, CCRP

Curt D. Furberg, MD, PhD

Lea N. Harvin, BS

Leora Henkin, MPH, Med

John Hepler, MA

Fang-Chi Hsu, PhD

Laura Lovato, MS

Wesley Roberson, BSBA

Julia Rushing, BSPH, MStat

Scott Rushing, BS

Cynthia L. Stowe, MPM  
Michael P. Walkup, MS  
Don Hire, BS  
W. Jack Rejeski, PhD  
Jeffrey A. Katula, PhD, MA  
Peter H. Brubaker, PhD  
Shannon L. Mihalko, PhD  
Janine M. Jennings, PhD

**National Institutes of Health, Bethesda, MD**

Evan C. Hadley, MD (National Institute on Aging)  
Sergei Romashkan, MD, PhD (National Institute on Aging)  
Kushang V. Patel, PhD (National Institute on Aging)

**National Heart, Lung and Blood Institute, Bethesda, MD**

Denise Bonds, MD, MPH

**Field Centers**

**Northwestern University, Chicago, IL**

Mary M. McDermott, MD – Field Center Principal Investigator  
Bonnie Spring, PhD – Field Center Co-Investigator  
Joshua Hauser, MD – Field Center Co-Investigator  
Diana Kerwin, MD – Field Center Co-Investigator  
Kathryn Domanchuk, BS  
Rex Graff, MS  
Alvito Rego, MA

**Pennington Biomedical Research Center, Baton Rouge, LA**

Timothy S. Church, MD, PhD, MPH – Field Center Principal Investigator  
Steven N. Blair, PED (University of South Carolina)  
Valerie H. Myers, PhD  
Ron Monce, PA-C  
Nathan E. Britt, NP  
Melissa Nauta Harris, BS  
Ami Parks McGucken, MPA, BS  
Ruben Rodarte, MBA, MS, BS  
Heidi K. Millet, MPA, BS  
Catrine Tudor-Locke, PhD, FACSM  
Ben P. Butitta, BS  
Sheletta G. Donatto, MS, RD, LDN, CDE  
Shannon H. Cocreham, BS

**Stanford University, Palo Alto, CA**

Abby C. King, PhD – Field Center Principal Investigator  
Cynthia M. Castro, PhD  
William L. Haskell, PhD  
Randall S. Stafford, MD, PhD  
Leslie A. Pruitt, PhD  
Kathy Berra, MSN, NP-C, FAAN  
Veronica Yank, MD

**Tufts University, Boston, MA**

Roger A. Fielding, PhD – Field Center Principal Investigator

Miriam E. Nelson, PhD – Field Center Co-Investigator  
Sara C. Folta, PhD – Field Center Co-Investigator  
Edward M. Phillips, MD  
Christine K. Liu, MD  
Erica C. McDavitt, MS  
Kieran F. Reid, PhD, MPH

Dylan R. Kirn, BS  
Evan P. Pasha, BS  
Won S. Kim, BS  
Vince E. Beard, BS  
Eleni X. Tsiroyannis, BS  
Cynthia Hau, BS, MPH

**University of Florida, Gainesville, FL**

Todd M. Manini, PhD – Field Center Principal Investigator  
Marco Pahor, MD – Field Center Co-Investigator  
Stephen D. Anton, PhD  
Susan Nayfield, MD  
Thomas W. Buford, PhD  
Michael Marsiske, PhD  
Bhanuprasad D. Sandesara, MD  
Jeffrey D. Knaggs, BS  
Megan S. Lorow, BS  
William C. Marena, MT, CCRC  
Irina Korytov, MD  
Holly L. Morris, MSN, RN, CCRC (Brooks Rehabilitation Clinical Research Center, Jacksonville, FL)  
Margo Fitch, PT (Brooks Rehabilitation Clinical Research Center, Jacksonville, FL)  
Floris F. Singletary, MS, CCC-SLP (Brooks Rehabilitation Clinical Research Center, Jacksonville, FL)  
Jackie Causer, BSH, RN (Brooks Rehabilitation Clinical Research Center, Jacksonville, FL)  
Katie A. Radcliff, MA (Brooks Rehabilitation Clinical Research Center, Jacksonville, FL)

**University of Pittsburgh, Pittsburgh, PA**

Anne B. Newman, MD, MPH – Field Center Principal Investigator  
Stephanie A. Studenski, MD, MPH – Field Center Co-Investigator  
Bret H. Goodpaster, PhD  
Nancy W. Glynn, PhD  
Oscar Lopez, MD  
Neelesh K. Nadkarni, MD, PhD  
Kathy Williams, RN, BSEd, MHSA  
Mark A. Newman, PhD  
George Grove, MS  
Janet T. Bonk, MPH, RN  
Jennifer Rush, MPH  
Piera Kost, BA (deceased)  
Diane G. Ives, MPH

**Wake Forest University, Winston Salem, NC**

Stephen B. Kritchevsky, Ph.D. – Field Center Principal Investigator  
Anthony P. Marsh, PhD – Field Center Co-Investigator  
Tina E. Brinkley, PhD  
Jamehl S. Demons, MD  
Kaycee M. Sink, MD, MAS



Kimberly Kennedy, BA, CCRC  
Rachel Shertzer-Skinner, MA, CCRC  
Abbie Wrights, MS  
Rose Fries, RN, CCRC  
Deborah Barr, MA, RHEd, CHES

**Yale University, New Haven, CT**

Thomas M. Gill, MD – Field Center Principal Investigator  
Robert S. Axtell, PhD, FACSM – Field Center Co-Investigator (Southern Connecticut State University, Exercise Science Department)  
Susan S. Kashaf, MD, MPH (VA Connecticut Healthcare System)  
Nathalie de Rekeneire, MD, MS  
Joanne M. McGloin, MDiv, MS, MBA  
Karen C. Wu, RN  
Denise M. Shepard, RN, MBA  
Barbara Fennelly, MA, RN

Lynne P. Iannone, MS, CCRP  
Raeleen Mautner, PhD  
Theresa Sweeney Barnett, MS, APRN  
Sean N. Halpin, MA  
Matthew J. Brennan, MA  
Julie A. Bugaj, MS  
Maria A. Zenoni, MS  
Bridget M. Mignosa, AS

**Cognition Coordinating Center, Wake Forest University, Winston Salem, NC**

Jeff Williamson, MD, MHS – Center Principal Investigator  
Kaycee M Sink, MD, MAS – Center Co-Investigator  
Hugh C. Hendrie, MB, ChB, DSc (Indiana University)  
Stephen R. Rapp, PhD  
Joe Verghese, MB, BS (Albert Einstein College of Medicine of Yeshiva University)  
Nancy Woolard  
Mark Espeland, PhD  
Janine Jennings, PhD  
Valerie K. Wilson, MD

**Electrocardiogram Reading Center, University of Florida, Gainesville, FL**

Carl J. Pepine MD, MACC  
Mario Ariet, PhD  
Eileen Handberg, PhD, ARNP  
Daniel Deluca, BS  
James Hill, MD, MS, FACC  
Anita Szady, MD

**Spirometry Reading Center, Yale University, New Haven, CT**

Geoffrey L. Chupp, MD  
Gail M. Flynn, RCP, CRFT  
Thomas M. Gill, MD  
John L. Hankinson, PhD (Hankinson Consulting, Inc.)  
Carlos A. Vaz Fragoso, MD

**Cost Effectiveness Analysis Center**

Erik J. Groessl, PhD (University of California, San Diego and VA San Diego Healthcare System)

Robert M. Kaplan, PhD (Office of Behavioral and Social Sciences Research, National Institutes of Health)
