# Supplementary material
Source: PubMed Central journal article supplement (PMC9062767)
Supplement: jamainternmed-e221449-s003.pdf [file jamainternmed-e221449-s003.pdf]

\*Indicates required information. Only first name, last name, and suffix will appear in PubMed.

| <b>*Group Name(s): LIFE Investigators</b> |              |                       |                  |                                    |                                          |                                                         |                                                                                            |
|-------------------------------------------|--------------|-----------------------|------------------|------------------------------------|------------------------------------------|---------------------------------------------------------|--------------------------------------------------------------------------------------------|
| *First Name and Middle Initial(s)         | *Last Name   | *Suffix (eg, Jr, III) | Academic Degrees | Institution                        | Location (city, state/province, country) | Role or Contribution, eg, chair, principal investigator | Group (if more than 1 Group listed in the byline) and/or Subgroup (eg, Steering Committee) |
| Marco                                     | Pahor        |                       | MD               | University of Florida              | Gainesville, FL                          | Principle Investigator                                  | Administrative Coordinating Center                                                         |
| Jack M                                    | Guralnik     |                       | MD PhD           | University of Maryland School of M | Baltimore, MD                            | Co-Investigator                                         | Administrative Coordinating Center                                                         |
| Christina                                 | Leeuwenburgh |                       | PhD              | University of Florida              | Gainesville, FL                          |                                                         | Administrative Coordinating Center                                                         |
| Connie                                    | Caudle       |                       |                  | University of Florida              | Gainesville, FL                          |                                                         | Administrative Coordinating Center                                                         |
| Lauren                                    | Crump        |                       | MPH              | University of Florida              | Gainesville, FL                          |                                                         | Administrative Coordinating Center                                                         |
| Latonia                                   | Holmes       |                       |                  | University of Florida              | Gainesville, FL                          |                                                         | Administrative Coordinating Center                                                         |
| Jocelyn                                   | Leeuwenburgh |                       | PhD              | University of Florida              | Gainesville, FL                          |                                                         | Administrative Coordinating Center                                                         |
| Ching-ju                                  | Lu           |                       | MPH              | University of Florida              | Gainesville, FL                          |                                                         | Administrative Coordinating Center                                                         |
| Michael E                                 | Miller       |                       | PhD              | Wake Forest University             | Winston Salem, NC                        | DMAQC Principal Investigator                            | Data Management, Analysis and Quality Control Center                                       |
| Mark A                                    | Espeland     |                       | PhD              | Wake Forest University             | Winston Salem, NC                        | DMAQC Co-Investigator                                   | Data Management, Analysis and Quality Control Center                                       |
| Walter T                                  | Ambrosius    |                       | PhD              | Wake Forest University             | Winston Salem, NC                        |                                                         | Data Management, Analysis and Quality Control Center                                       |
| William                                   | Applegate    |                       | MD               | Wake Forest University             | Winston Salem, NC                        |                                                         | Data Management, Analysis and Quality Control Center                                       |

## Supplemental Online Content: Nonauthor Collaborators

\*Indicates required information. Only first name, last name, and suffix will appear in PubMed.

| *First Name and Middle Initial(s) | *Last Name | *Suffix (eg, Jr, III) | Academic Degrees | Institution            | Location (city, state/province, country) | Role or Contribution, eg, chair, principal investigator | Group (if more than 1 Group listed in the byline) and/or Subgroup (eg, Steering Committee) |
|-----------------------------------|------------|-----------------------|------------------|------------------------|------------------------------------------|---------------------------------------------------------|--------------------------------------------------------------------------------------------|
| Daniel P                          | Beavers    |                       | PhD MS           | Wake Forest University | Winston Salem, NC                        |                                                         | Data Management, Analysis and Quality Control Center                                       |
| Robert P                          | Byington   |                       | PhD MPH<br>FAHA  | Wake Forest University | Winston Salem, NC                        |                                                         | Data Management, Analysis and Quality Control Center                                       |
| Delilah                           | Cook       |                       | CCRP             | Wake Forest University | Winston Salem, NC                        |                                                         | Data Management, Analysis and Quality Control Center                                       |
| Curt D                            | Furberg    |                       | MD PhD           | Wake Forest University | Winston Salem, NC                        |                                                         | Data Management, Analysis and Quality Control Center                                       |
| Lea N                             | Harvin     |                       | BS               | Wake Forest University | Winston Salem, NC                        |                                                         | Data Management, Analysis and Quality Control Center                                       |
| Leora                             | Henkin     |                       | MPH Med          | Wake Forest University | Winston Salem, NC                        |                                                         | Data Management, Analysis and Quality Control Center                                       |
| John                              | Hepler     |                       | MA               | Wake Forest University | Winston Salem, NC                        |                                                         | Data Management, Analysis and Quality Control Center                                       |
| Fang-Chi                          | Hsu        |                       | PhD              | Wake Forest University | Winston Salem, NC                        |                                                         | Data Management, Analysis and Quality Control Center                                       |
| Laura                             | Lovato     |                       | MS               | Wake Forest University | Winston Salem, NC                        |                                                         | Data Management, Analysis and Quality Control Center                                       |
| Wesley                            | Roberson   |                       | BSBA             | Wake Forest University | Winston Salem, NC                        |                                                         | Data Management, Analysis and Quality Control Center                                       |

Supplemental Online Content: Nonauthor Collaborators

\*Indicates required information. Only first name, last name, and suffix will appear in PubMed.

| *First Name and Middle Initial(s) | *Last Name | *Suffix (eg, Jr, III) | Academic Degrees | Institution            | Location (city, state/province, country) | Role or Contribution, eg, chair, principal investigator | Group (if more than 1 Group listed in the byline) and/or Subgroup (eg, Steering Committee) |
|-----------------------------------|------------|-----------------------|------------------|------------------------|------------------------------------------|---------------------------------------------------------|--------------------------------------------------------------------------------------------|
| Julia                             | Rushing    |                       | Mstat            | Wake Forest University | Winston Salem, NC                        |                                                         | Data Management, Analysis and Quality Control Center                                       |
| Scott                             | Rushing    |                       | BS               | Wake Forest University | Winston Salem, NC                        |                                                         | Data Management, Analysis and Quality Control Center                                       |
| Cynthia L                         | Stowe      |                       | MPM              | Wake Forest University | Winston Salem, NC                        |                                                         | Data Management, Analysis and Quality Control Center                                       |
| Michael P                         | Walkup     |                       | MS               | Wake Forest University | Winston Salem, NC                        |                                                         | Data Management, Analysis and Quality Control Center                                       |
| Don                               | Hire       |                       | BS               | Wake Forest University | Winston Salem, NC                        |                                                         | Data Management, Analysis and Quality Control Center                                       |
| W Jack                            | Rejeski    |                       | PhD              | Wake Forest University | Winston Salem, NC                        |                                                         | Data Management, Analysis and Quality Control Center                                       |
| Jeffrey A                         | Katula     |                       | PhD MA           | Wake Forest University | Winston Salem, NC                        |                                                         | Data Management, Analysis and Quality Control Center                                       |
| Peter H                           | Brubaker   |                       | PhD              | Wake Forest University | Winston Salem, NC                        |                                                         | Data Management, Analysis and Quality Control Center                                       |
| Shannon L                         | Mihalko    |                       | PhD              | Wake Forest University | Winston Salem, NC                        |                                                         | Data Management, Analysis and Quality Control Center                                       |
| Janine M                          | Jennings   |                       | PhD              | Wake Forest University | Winston Salem, NC                        |                                                         | Data Management, Analysis and Quality Control Center                                       |

## Supplemental Online Content: Nonauthor Collaborators

\*Indicates required information. Only first name, last name, and suffix will appear in PubMed.

| *First Name and Middle Initial(s) | *Last Name | *Suffix (eg, Jr, III) | Academic Degrees | Institution                           | Location (city, state/province, country) | Role or Contribution, eg, chair, principal investigator | Group (if more than 1 Group listed in the byline) and/or Subgroup (eg, Steering Committee) |
|-----------------------------------|------------|-----------------------|------------------|---------------------------------------|------------------------------------------|---------------------------------------------------------|--------------------------------------------------------------------------------------------|
| Evan C                            | Hadley     |                       | MD               | National Institutes of Health         | Bethesda, MD                             |                                                         | National Institute on Aging                                                                |
| Sergi                             | Romashkan  |                       | MD PhD           | National Institutes of Health         | Bethesda, MD                             |                                                         | National Institute on Aging                                                                |
| Kushang V                         | Patel      |                       | PhD              | National Institutes of Health         | Bethesda, MD                             |                                                         | National Institute on Aging                                                                |
| Denise                            | Bonds      |                       | MD MPH           | National Institutes of Health         | Bethesda, MD                             |                                                         | National Heart, Lung and Blood Institute                                                   |
| Mary M                            | McDermott  |                       | MD               | Northwestern University               | Chicago, IL                              | Field Center Principal Investigator                     | Field Center (NWU)                                                                         |
| Bonnie                            | Spring     |                       | PhD              | Northwestern University               | Chicago, IL                              | Field Center Co-Investigator                            | Field Center (NWU)                                                                         |
| Joshua                            | Hauser     |                       | MD               | Northwestern University               | Chicago, IL                              | Field Center Co-Investigator                            | Field Center (NWU)                                                                         |
| Diana                             | Kerwin     |                       | MD               | Northwestern University               | Chicago, IL                              | Field Center Co-Investigator                            | Field Center (NWU)                                                                         |
| Kathryn                           | Domanchuk  |                       | BS               | Northwestern University               | Chicago, IL                              |                                                         | Field Center (NWU)                                                                         |
| Rex                               | Graff      |                       | MS               | Northwestern University               | Chicago, IL                              |                                                         | Field Center (NWU)                                                                         |
| Alvito                            | Rego       |                       | MA               | Northwestern University               | Chicago, IL                              |                                                         | Field Center (NWU)                                                                         |
| Timothy S                         | Church     |                       | MD PhD MPH       | Pennington Biomedical Research Center | Baton Rouge, LA                          | Field Center Principal Investigator                     | Field Center (PBMRC)                                                                       |
| Steven N                          | Blair      |                       | PED              | University of South Carolina          | Columbia, SC                             |                                                         | Field Center (PBMRC)                                                                       |
| Valerie H                         | Myers      |                       | PhD              | Pennington Biomedical Research Center | Baton Rouge, LA                          |                                                         | Field Center (PBMRC)                                                                       |
| Ron                               | Monce      |                       | PA-C             | Pennington Biomedical Research Center | Baton Rouge, LA                          |                                                         | Field Center (PBMRC)                                                                       |
| Nathan E                          | Britt      |                       | NP               | Pennington Biomedical Research Center | Baton Rouge, LA                          |                                                         | Field Center (PBMRC)                                                                       |

## Supplemental Online Content: Nonauthor Collaborators

\*Indicates required information. Only first name, last name, and suffix will appear in PubMed.

| *First Name and Middle Initial(s) | *Last Name  | *Suffix (eg, Jr, III) | Academic Degrees | Institution                           | Location (city, state/province, country) | Role or Contribution, eg, chair, principal investigator | Group (if more than 1 Group listed in the byline) and/or Subgroup (eg, Steering Committee) |
|-----------------------------------|-------------|-----------------------|------------------|---------------------------------------|------------------------------------------|---------------------------------------------------------|--------------------------------------------------------------------------------------------|
| Melissa                           | Harris      |                       | BS               | Pennington Biomedical Research Center | Baton Rouge, LA                          |                                                         | Field Center (PBMRC)                                                                       |
| Ami                               | McGucken    |                       | MPA BS           | Pennington Biomedical Research Center | Baton Rouge, LA                          |                                                         | Field Center (PBMRC)                                                                       |
| Ruben                             | Rodarte     |                       | MBA MS<br>BS     | Pennington Biomedical Research Center | Baton Rouge, LA                          |                                                         | Field Center (PBMRC)                                                                       |
| Heidi K                           | Millet      |                       | MPA BS           | Pennington Biomedical Research Center | Baton Rouge, LA                          |                                                         | Field Center (PBMRC)                                                                       |
| Catrine                           | Tudor-Locke |                       | PhD<br>FACSM     | Pennington Biomedical Research Center | Baton Rouge, LA                          |                                                         | Field Center (PBMRC)                                                                       |
| Ben P                             | Butitta     |                       | BS               | Pennington Biomedical Research Center | Baton Rouge, LA                          |                                                         | Field Center (PBMRC)                                                                       |
| Sheletta                          | Donatto     |                       | MS RD<br>LDN CDE | Pennington Biomedical Research Center | Baton Rouge, LA                          |                                                         | Field Center (PBMRC)                                                                       |
| Shannon H                         | Cocreham    |                       | BS               | Pennington Biomedical Research Center | Baton Rouge, LA                          |                                                         | Field Center (PBMRC)                                                                       |
| Abby C                            | King        |                       | PhD              | Stanford University                   | Palo Alto, CA                            | Field Center Principal Investigator                     | Field Center (Stanford)                                                                    |
| Cynthia M                         | Castro      |                       | PhD              | Stanford University                   | Palo Alto, CA                            |                                                         | Field Center (Stanford)                                                                    |
| William L                         | Haskell     |                       | PhD              | Stanford University                   | Palo Alto, CA                            |                                                         | Field Center (Stanford)                                                                    |
| Randall S                         | Stafford    |                       | MD PhD           | Stanford University                   | Palo Alto, CA                            |                                                         | Field Center (Stanford)                                                                    |
| Leslie A                          | Pruitt      |                       | PhD              | Stanford University                   | Palo Alto, CA                            |                                                         | Field Center (Stanford)                                                                    |
| Kathy                             | Berra       |                       | MSN NP-C<br>FAAN | Stanford University                   | Palo Alto, CA                            |                                                         | Field Center (Stanford)                                                                    |
| Veronica                          | Yank        |                       | MD               | Stanford University                   | Palo Alto, CA                            |                                                         | Field Center (Stanford)                                                                    |

## Supplemental Online Content: Nonauthor Collaborators

\*Indicates required information. Only first name, last name, and suffix will appear in PubMed.

| *First Name and Middle Initial(s) | *Last Name  | *Suffix (eg, Jr, III) | Academic Degrees | Institution           | Location (city, state/province, country) | Role or Contribution, eg, chair, principal investigator | Group (if more than 1 Group listed in the byline) and/or Subgroup (eg, Steering Committee) |
|-----------------------------------|-------------|-----------------------|------------------|-----------------------|------------------------------------------|---------------------------------------------------------|--------------------------------------------------------------------------------------------|
| Roger A                           | Fielding    |                       | PhD              | Tufts University      | Boston, MA                               | Field Center Principal Investigator                     | Field Center (Tufts)                                                                       |
| Miriam E                          | Nelson      |                       | PhD              | Tufts University      | Boston, MA                               | Field Center Co-Investigator                            | Field Center (Tufts)                                                                       |
| Sara C                            | Folta       |                       | PhD              | Tufts University      | Boston, MA                               | Field Center Co-Investigator                            | Field Center (Tufts)                                                                       |
| Edward M                          | Phillips    |                       | MD               | Tufts University      | Boston, MA                               |                                                         | Field Center (Tufts)                                                                       |
| Christine K                       | Liu         |                       | MD               | Tufts University      | Boston, MA                               |                                                         | Field Center (Tufts)                                                                       |
| Erica C                           | McDavitt    |                       | MS               | Tufts University      | Boston, MA                               |                                                         | Field Center (Tufts)                                                                       |
| Kieran F                          | Reid        |                       | PhD MPH          | Tufts University      | Boston, MA                               |                                                         | Field Center (Tufts)                                                                       |
| Dylan R                           | Kirn        |                       | BS               | Tufts University      | Boston, MA                               |                                                         | Field Center (Tufts)                                                                       |
| Evan P                            | Pasha       |                       | BS               | Tufts University      | Boston, MA                               |                                                         | Field Center (Tufts)                                                                       |
| Won S                             | Kim         |                       | BS               | Tufts University      | Boston, MA                               |                                                         | Field Center (Tufts)                                                                       |
| Vince E                           | Beard       |                       | BS               | Tufts University      | Boston, MA                               |                                                         | Field Center (Tufts)                                                                       |
| Eleni X                           | Tsiroyannis |                       | BS               | Tufts University      | Boston, MA                               |                                                         | Field Center (Tufts)                                                                       |
| Cynthia                           | Hau         |                       | BS MPH           | Tufts University      | Boston, MA                               |                                                         | Field Center (Tufts)                                                                       |
| Todd M                            | Manini      |                       | PhD              | University of Florida | Gainesville, FL                          | Field Center Principal Investigator                     | Field Center (UF)                                                                          |
| Marco                             | Pahor       |                       | MD               | University of Florida | Gainesville, FL                          | Field Center Co-Investigator                            | Field Center (UF)                                                                          |
| Stephen D                         | Anton       |                       | PhD              | University of Florida | Gainesville, FL                          |                                                         | Field Center (UF)                                                                          |
| Susan                             | Nayfield    |                       | MD               | University of Florida | Gainesville, FL                          |                                                         | Field Center (UF)                                                                          |
| Thomas W                          | Buford      |                       | PhD              | University of Florida | Gainesville, FL                          |                                                         | Field Center (UF)                                                                          |
| Michael                           | Marsiske    |                       | PhD              | University of Florida | Gainesville, FL                          |                                                         | Field Center (UF)                                                                          |
| Bhanuprasad D                     | Sandesara   |                       | MD               | University of Florida | Gainesville, FL                          |                                                         | Field Center (UF)                                                                          |
| Jeffrey D                         | Knaggs      |                       | BS               | University of Florida | Gainesville, FL                          |                                                         | Field Center (UF)                                                                          |
| Megan S                           | Lorow       |                       | BS               | University of Florida | Gainesville, FL                          |                                                         | Field Center (UF)                                                                          |
| William C                         | Marena      |                       | MT CCRC          | University of Florida | Gainesville, FL                          |                                                         | Field Center (UF)                                                                          |
| Irina                             | Korytov     |                       | MD               | University of Florida | Gainesville, FL                          |                                                         | Field Center (UF)                                                                          |

## Supplemental Online Content: Nonauthor Collaborators

\*Indicates required information. Only first name, last name, and suffix will appear in PubMed.

| *First Name and Middle Initial(s) | *Last Name  | *Suffix (eg, Jr, III) | Academic Degrees | Institution                                    | Location (city, state/province, country) | Role or Contribution, eg, chair, principal investigator | Group (if more than 1 Group listed in the byline) and/or Subgroup (eg, Steering Committee) |
|-----------------------------------|-------------|-----------------------|------------------|------------------------------------------------|------------------------------------------|---------------------------------------------------------|--------------------------------------------------------------------------------------------|
| Holly L                           | Morris      |                       | MSN RN<br>CCRC   | Brooks Rehabilitation Clinical Research Center | Jacksonville, FL                         |                                                         | Field Center (UF)                                                                          |
| Margo                             | Fitch       |                       | PT               | Brooks Rehabilitation Clinical Research Center | Jacksonville, FL                         |                                                         | Field Center (UF)                                                                          |
| Floris F                          | Singletary  |                       | MS CCC-<br>SLP   | Brooks Rehabilitation Clinical Research Center | Jacksonville, FL                         |                                                         | Field Center (UF)                                                                          |
| Jackie                            | Causer      |                       | BSH RN           | Brooks Rehabilitation Clinical Research Center | Jacksonville, FL                         |                                                         | Field Center (UF)                                                                          |
| Katie A                           | Radcliff    |                       | MA               | Brooks Rehabilitation Clinical Research Center | Jacksonville, FL                         |                                                         | Field Center (UF)                                                                          |
| Anne B                            | Newman      |                       | MD MPH           | University of Pittsburgh                       | Pittsburgh, PA                           | Field Center Principal Investigator                     | Field Center (UP)                                                                          |
| Stephanie A                       | Studenski   |                       | MD MPH           | University of Pittsburgh                       | Pittsburgh, PA                           | Field Center Co-Investigator                            | Field Center (UP)                                                                          |
| Bret H                            | Goodpaster  |                       | PhD              | University of Pittsburgh                       | Pittsburgh, PA                           |                                                         | Field Center (UP)                                                                          |
| Nancy W                           | Glynn       |                       | PhD              | University of Pittsburgh                       | Pittsburgh, PA                           |                                                         | Field Center (UP)                                                                          |
| Oscar                             | Lopez       |                       | MD               | University of Pittsburgh                       | Pittsburgh, PA                           |                                                         | Field Center (UP)                                                                          |
| Neelesh K                         | Nadkarni    |                       | MD PhD           | University of Pittsburgh                       | Pittsburgh, PA                           |                                                         | Field Center (UP)                                                                          |
| Kathy                             | Williams    |                       | RN BSEd<br>MHSA  | University of Pittsburgh                       | Pittsburgh, PA                           |                                                         | Field Center (UP)                                                                          |
| Mark A                            | Newman      |                       | PhD              | University of Pittsburgh                       | Pittsburgh, PA                           |                                                         | Field Center (UP)                                                                          |
| Geroge                            | Grove       |                       | MS               | University of Pittsburgh                       | Pittsburgh, PA                           |                                                         | Field Center (UP)                                                                          |
| Janet T                           | Bonk        |                       | MPH RN           | University of Pittsburgh                       | Pittsburgh, PA                           |                                                         | Field Center (UP)                                                                          |
| Jennifer                          | Rushing     |                       | MPH              | University of Pittsburgh                       | Pittsburgh, PA                           |                                                         | Field Center (UP)                                                                          |
| Piera                             | Kost        |                       | BA               | University of Pittsburgh                       | Pittsburgh, PA                           |                                                         | Field Center (UP)                                                                          |
| Diane G                           | Ives        |                       | MPH              | University of Pittsburgh                       | Pittsburgh, PA                           |                                                         | Field Center (UP)                                                                          |
| Stephen B                         | Kritchevsky |                       | PhD              | Wake Forest University                         | Winston Salem, NC                        | Field Center Principal Investigator                     | Field Center (WFU)                                                                         |

## Supplemental Online Content: Nonauthor Collaborators

\*Indicates required information. Only first name, last name, and suffix will appear in PubMed.

| *First Name and Middle Initial(s) | *Last Name         | *Suffix (eg, Jr, III) | Academic Degrees | Institution                                                        | Location (city, state/province, country) | Role or Contribution, eg, chair, principal investigator | Group (if more than 1 Group listed in the byline) and/or Subgroup (eg, Steering Committee) |
|-----------------------------------|--------------------|-----------------------|------------------|--------------------------------------------------------------------|------------------------------------------|---------------------------------------------------------|--------------------------------------------------------------------------------------------|
| Anthony P                         | Marsh              |                       | PhD              | Wake Forest University                                             | Winston Salem, NC                        | Field Center Co-Investigator                            | Field Center (WFU)                                                                         |
| Tina E                            | Brinkley           |                       | PhD              | Wake Forest University                                             | Winston Salem, NC                        |                                                         | Field Center (WFU)                                                                         |
| Jamehl S                          | Demons             |                       | MD               | Wake Forest University                                             | Winston Salem, NC                        |                                                         | Field Center (WFU)                                                                         |
| Kaycee M                          | Sink               |                       | MD MAS           | Wake Forest University                                             | Winston Salem, NC                        |                                                         | Field Center (WFU)                                                                         |
| Kimberly                          | Kennedy            |                       | BA CCRC          | Wake Forest University                                             | Winston Salem, NC                        |                                                         | Field Center (WFU)                                                                         |
| Rachel                            | Shertzer-Skinner   |                       | MA CCRC          | Wake Forest University                                             | Winston Salem, NC                        |                                                         | Field Center (WFU)                                                                         |
| Abbie                             | Wrights            |                       | MS               | Wake Forest University                                             | Winston Salem, NC                        |                                                         | Field Center (WFU)                                                                         |
| Rose                              | Fries              |                       | RN CCRC          | Wake Forest University                                             | Winston Salem, NC                        |                                                         | Field Center (WFU)                                                                         |
| Deborah                           | Barr               |                       | MA RHED<br>CHES  | Wake Forest University                                             | Winston Salem, NC                        |                                                         | Field Center (WFU)                                                                         |
| Thomas M                          | Gill               |                       | MD               | Yale University                                                    | New Haven, CT                            | Field Center Principal Investigator                     | Field Center (Yale)                                                                        |
| Robert S                          | Axtell             |                       | PhD<br>FACSM     | Southern Connecticut State University, Exercise Science Department | New Haven, CT                            | Field Center Co-Investigator                            | Field Center (Yale)                                                                        |
| Susan S                           | Kashaf             |                       | MD MPH           | VA Connecticut Healthcare System                                   | West Haven, CT                           |                                                         | Field Center (Yale)                                                                        |
| Nathalie                          | de Rekeneire       |                       | RN               | Yale University                                                    | New Haven, CT                            |                                                         | Field Center (Yale)                                                                        |
| Joanne M                          | McGloin            |                       | RN MBA           | Yale University                                                    | New Haven, CT                            |                                                         | Field Center (Yale)                                                                        |
| Karen C                           | Wu                 |                       | RN               | Yale University                                                    | New Haven, CT                            |                                                         | Field Center (Yale)                                                                        |
| Denise M                          | Shepard            |                       | RN MBA           | Yale University                                                    | New Haven, CT                            |                                                         | Field Center (Yale)                                                                        |
| Barbara                           | Fennelly           |                       | MA RN            | Yale University                                                    | New Haven, CT                            |                                                         | Field Center (Yale)                                                                        |
| Lynne P                           | Iannone            |                       | MS CCRP          | Yale University                                                    | New Haven, CT                            |                                                         | Field Center (Yale)                                                                        |
| Raeleen                           | Mautner            |                       | PhD              | Yale University                                                    | New Haven, CT                            |                                                         | Field Center (Yale)                                                                        |
| Theresa                           | Sweeney<br>Barnett |                       | MS APRN          | Yale University                                                    | New Haven, CT                            |                                                         | Field Center (Yale)                                                                        |
| Sean N                            | Halpin             |                       | MA               | Yale University                                                    | New Haven, CT                            |                                                         | Field Center (Yale)                                                                        |
| Matthew J                         | Brennan            |                       | MA               | Yale University                                                    | New Haven, CT                            |                                                         | Field Center (Yale)                                                                        |



## Supplemental Online Content: Nonauthor Collaborators

\*Indicates required information. Only first name, last name, and suffix will appear in PubMed.

| *First Name and Middle Initial(s) | *Last Name | *Suffix (eg, Jr, III) | Academic Degrees | Institution                                                  | Location (city, state/province, country) | Role or Contribution, eg, chair, principal investigator | Group (if more than 1 Group listed in the byline) and/or Subgroup (eg, Steering Committee) |
|-----------------------------------|------------|-----------------------|------------------|--------------------------------------------------------------|------------------------------------------|---------------------------------------------------------|--------------------------------------------------------------------------------------------|
| Julie A                           | Bugaj      |                       | MS               | Yale University                                              | New Haven, CT                            |                                                         | Field Center (Yale)                                                                        |
| Maria A                           | Zenoni     |                       | MS               | Yale University                                              | New Haven, CT                            |                                                         | Field Center (Yale)                                                                        |
| Bridget M                         | Mignosa    |                       | AS               | Yale University                                              | New Haven, CT                            |                                                         | Field Center (Yale)                                                                        |
| Jeff                              | Williamson |                       | MD MHS           | Wake Forest University                                       | Winston Salem, NC                        | Center Principal Investigator                           | Cognition Coordinating Center                                                              |
| Kaycee M                          | Sink       |                       | MD MAS           | Wake Forest University                                       | Winston Salem, NC                        | Center Co-Investigator                                  | Cognition Coordinating Center                                                              |
| Hugh C                            | Hendrie    |                       | MB CHB<br>DSc    | Indiana University                                           | Bloomington, IN                          |                                                         | Cognition Coordinating Center                                                              |
| Stephen R                         | Rapp       |                       | PhD              | Wake Forest University                                       | Winston Salem, NC                        |                                                         | Cognition Coordinating Center                                                              |
| Joe                               | Vergheze   |                       | MB BS            | Albert Einstein College of Medicine<br>of Yeshiva University | New York City, NY                        |                                                         | Cognition Coordinating Center                                                              |
| Nancy                             | Woolard    |                       |                  | Wake Forest University                                       | Winston Salem, NC                        |                                                         | Cognition Coordinating Center                                                              |
| Mark                              | Espeland   |                       | PhD              | Wake Forest University                                       | Winston Salem, NC                        |                                                         | Cognition Coordinating Center                                                              |
| Janine                            | Jennings   |                       | PhD              | Wake Forest University                                       | Winston Salem, NC                        |                                                         | Cognition Coordinating Center                                                              |
| Valerie K                         | Wilson     |                       | MD               | Wake Forest University                                       | Winston Salem, NC                        |                                                         | Cognition Coordinating Center                                                              |
| Carl J                            | Pepine     |                       | MD MACC          | University of Florida                                        | Gainesville, FL                          |                                                         | Electrocardiogram Reading Center                                                           |
| Mario                             | Ariet      |                       | PhD              | University of Florida                                        | Gainesville, FL                          |                                                         | Electrocardiogram Reading Center                                                           |
| Eileen                            | Handberg   |                       | PhD ARNP         | University of Florida                                        | Gainesville, FL                          |                                                         | Electrocardiogram Reading Center                                                           |
| Daniel                            | Deluca     |                       | BS               | University of Florida                                        | Gainesville, FL                          |                                                         | Electrocardiogram Reading Center                                                           |
| James                             | Hill       |                       | MD MS<br>FACC    | University of Florida                                        | Gainesville, FL                          |                                                         | Electrocardiogram Reading Center                                                           |

## Supplemental Online Content: Nonauthor Collaborators

\*Indicates required information. Only first name, last name, and suffix will appear in PubMed.

| *First Name and Middle Initial(s) | *Last Name  | *Suffix (eg, Jr, III) | Academic Degrees | Institution                                                                     | Location (city, state/province, country) | Role or Contribution, eg, chair, principal investigator | Group (if more than 1 Group listed in the byline) and/or Subgroup (eg, Steering Committee) |
|-----------------------------------|-------------|-----------------------|------------------|---------------------------------------------------------------------------------|------------------------------------------|---------------------------------------------------------|--------------------------------------------------------------------------------------------|
| Anita                             | Szady       |                       | MD               | University of Florida                                                           | Gainesville, FL                          |                                                         | Electrocardiogram Reading Center                                                           |
| Geoffrey L                        | Chupp       |                       | MD               | Yale University                                                                 | New Haven, CT                            |                                                         | Spirometry Reading Center                                                                  |
| Gail M                            | Flynn       |                       | RCP CRFT         | Yale University                                                                 | New Haven, CT                            |                                                         | Spirometry Reading Center                                                                  |
| Thomas M                          | Gill        |                       | MD               | Yale University                                                                 | New Haven, CT                            |                                                         | Spirometry Reading Center                                                                  |
| John L                            | Hankinson   |                       | PhD              | Hankinson Consulting, Inc                                                       | Athens, GA                               |                                                         | Spirometry Reading Center                                                                  |
| Carlos A                          | Vaz Fragoso |                       | MD               | Yale University                                                                 | New Haven, CT                            |                                                         | Spirometry Reading Center                                                                  |
| Erik J                            | Groessl     |                       | PhD              | University of California, San Diego and VA San Diego Healthcare System          | La Jolla, CA                             |                                                         | Cost Effectiveness Analysis Center                                                         |
| Robert M                          | Kaplan      |                       | PhD              | Office of Behavioral and Social Sciences Resarch, National Institutes of Health | Bethesda, MD                             |                                                         | Cost Effectiveness Analysis Center                                                         |
